# Supplementary material for: Association between ADAM33 Single-Nucleotide Polymorphisms and Treatment Response to Inhaled Corticosteroids and a Long-Acting Beta-Agonist in Asthma
Source: MDPI journal article supplement (doi:10.3390/diagnostics13030405), 2023-01-22
Supplement: s1 [file s1]

## Article

# Association Between *ADAM33* Single-Nucleotide Polymorphisms and Treatment Response to Inhaled Corticosteroids and a Long-Acting Beta-Agonist in Asthma: Supplementary Material

Sangeetha Vishweswaraiah <sup>1</sup>, Nallur B. Ramachandra <sup>1</sup>, Neha Joshi <sup>2</sup>, Ashwaghosha Parthasarathi <sup>3,4</sup>, Mohammed Kaleem Ullah <sup>5,6</sup>, Jayaraj Biligere Siddaiah <sup>2</sup>, Amrutha D. Holla <sup>3</sup>, Samarpana Chakraborty <sup>7</sup>, Anurag Agrawal <sup>7</sup> and Padukudru Anand Mahesh <sup>2,\*</sup>

<sup>1</sup> Department of Studies in Genetics and Genomics, University of Mysore, Manasagangotri, Mysore 570006, India; sangeetha.vsh@gmail.com (S.V.); ramachandra@genetics.uni-mysore.ac.in (N.B.R.)

<sup>2</sup> Department of Respiratory Medicine, JSS Medical College, JSS Academy of Higher Education and Research, Mysore 570015, India; joshi.neha2605@gmail.com (N.J.); bsjayaraj@jssuni.edu.in (J.B.S.)

<sup>3</sup> Allergy, Asthma and Chest Centre, Krishnamurthypuram, Mysore 570004, India; ap2320@rwjms.rutgers.edu (A.P.); amruthadh@yahoo.com (A.D.H.)

<sup>4</sup> Rutgers Centre for Pharmacoeconomics and Treatment Science, New Brunswick, NJ 08901-1293, USA

<sup>5</sup> Centre for Excellence in Molecular Biology and Regenerative Medicine (A DST-FIST Supported Center), Department of Biochemistry (A DST-FIST Supported Department), JSS Medical College, JSS Academy of Higher Education and Research, Mysore 570015, India; ka7eem@jssuni.edu.in

<sup>6</sup> Division of Infectious Disease and Vaccinology, School of Public Health, University of California, Berkeley, CA 94720, USA

<sup>7</sup> Center of Excellence, Translational Research in Asthma and Lung Disease, CSIR-Institute of Genomics & Integrative Biology, AcSIR (Academy of Scientific and Innovative Research), Delhi 110025, India; samarpana.chakraborty@gmail.com (S.C.); anurag.agrawal@ashoka.edu.in (A.A.)

\* Correspondence: pamahesh@jssuni.edu.in; Tel.: +91-9448044003

**Table S1.** Unextended primer (UEP) sequences used for massARRAY analysis along with the extended (E1/E2) alleles and mass in Daltons used for genotyping of *ADAM33* variants in controls and asthma patients.

| Sl No. | SNP rs ID | UEP Sequence          | Allele (E1/E2) | Mass of UEP/E1/E2    |
|--------|-----------|-----------------------|----------------|----------------------|
| 1      | rs2280091 | GGGCGGCGTTCACCCCA     | G/A            | 5172.4/5419.5/5499.5 |
| 2      | rs2787094 | GTCCACACTCCCCTG       | G/C            | 4448.9/4696.1/4736.1 |
| 3      | rs3918396 | GGCCATGCTCCTCAGC      | A/G            | 5107.3/5378.5/5394.5 |
| 4      | rs677044  | CCAGCCCTCAGGAACCTTCTA | G/A            | 6021.9/6293.1/6309.1 |
| 5      | rs2853209 | TGGCCTCCCAGTCAAGCG    | T/A            | 5764.7/6036/6091.8   |

6 rs3918392 GCTCACCTGGAAAGGA A/G 6176/6447.2/6463.2

**Table S2.** Hardy-Weinberg Equilibrium (HWE) test, genotype and Minor Allele Frequency (MAF) of ADAM33 in healthy controls (C) and asthma patients (P).

| SNP       | Sample Size |     | Minor allele frequency |        | Genotype | C   | P   | OR (95 % CI)    | p-value | HWE p-value |       |
|-----------|-------------|-----|------------------------|--------|----------|-----|-----|-----------------|---------|-------------|-------|
|           | C           | P   | C                      | P      |          |     |     |                 |         | C           | P     |
| rs2280091 | 486         | 503 | G-0.16                 | G-0.17 | AA       | 344 | 353 | Reference       |         | 0.017       | 0.041 |
|           |             |     |                        |        | GA       | 121 | 129 | 1.04(0.78-1.39) | 0.795   |             |       |
|           |             |     |                        |        | GG       | 21  | 21  | 0.97(0.52-1.81) | 0.935   |             |       |
|           |             |     |                        |        | A        | 809 | 835 | Reference       |         |             |       |
| rs2787094 | 486         | 503 | C-0.24                 | C-0.27 | G        | 163 | 171 | 1.02(0.80-1.28) | 0.891   | 0.235       | 0.781 |
|           |             |     |                        |        | GG       | 270 | 269 | Reference       |         |             |       |
|           |             |     |                        |        | GC       | 191 | 196 | 1.03(0.79-1.33) | 0.824   |             |       |
|           |             |     |                        |        | CC       | 25  | 38  | 1.52(0.89-2.59) | 0.119   |             |       |
| rs3918396 | 486         | 503 | A-0.10                 | A-0.12 | G        | 731 | 734 | Reference       |         | 0.568       | 0.907 |
|           |             |     |                        |        | C        | 241 | 272 | 1.12(0.92-1.37) | 0.255   |             |       |
|           |             |     |                        |        | GG       | 387 | 389 | Reference       |         |             |       |
|           |             |     |                        |        | GA       | 92  | 107 | 1.15(0.85-1.58) | 0.359   |             |       |
| rs677044  | 486         | 503 | G-0.23                 | G-0.23 | AA       | 7   | 7   | 0.99(0.34-2.86) | 0.992   | 0.726       | 0.588 |
|           |             |     |                        |        | G        | 866 | 885 | Reference       |         |             |       |
|           |             |     |                        |        | A        | 106 | 121 | 1.12(0.84-1.47) | 0.433   |             |       |
|           |             |     |                        |        | AA       | 345 | 327 | Reference       |         |             |       |
| rs2853209 | 486         | 503 | T-0.42                 | T-0.37 | AG       | 121 | 155 | 1.05(0.78-1.42) | 0.71    | 0.017       | 0.761 |
|           |             |     |                        |        | GG       | 20  | 21  | 0.86(0.45-1.64) | 0.66    |             |       |
|           |             |     |                        |        | A        | 811 | 809 | Reference       |         |             |       |
|           |             |     |                        |        | G        | 161 | 197 | 0.99(0.78-1.26) | 0.978   |             |       |
| rs3918392 | 486         | 503 | G-0.08                 | G-0.08 | AA       | 265 | 247 | Reference       |         | 0.84        | 0.562 |
|           |             |     |                        |        | TA       | 147 | 195 | 0.98(0.71-1.34) | 0.915   |             |       |
|           |             |     |                        |        | TT       | 74  | 61  | 0.61(0.40-0.92) | 0.018   |             |       |
|           |             |     |                        |        | A        | 677 | 689 | Reference       |         |             |       |
| rs3918392 | 486         | 503 | G-0.08                 | G-0.08 | T        | 295 | 317 | 0.80(0.65-0.98) | 0.035   | 0.84        | 0.562 |
|           |             |     |                        |        | AA       | 432 | 435 | Reference       |         |             |       |
|           |             |     |                        |        | AG       | 52  | 64  | 1.0(0.67-1.50)  | 0.967   |             |       |

|    |     |     |                 |       |
|----|-----|-----|-----------------|-------|
| GG | 2   | 4   | 1.63(0.29-9.0)  | 0.57  |
| A  | 916 | 934 | Reference       |       |
| G  | 56  | 72  | 1.05(0.73-1.51) | 0.783 |

**Table S3.** Genotype and allele frequency distribution of *ADAM33* SNPs among controls (C) and patients with Severe (Se), Moderate (Mo) and Mild (Mi) asthma patients.

| SNP              | Genotype | C   | Patients allele count |      |     | OR (95 % CI)     |                  |                  | p-value |       |       |
|------------------|----------|-----|-----------------------|------|-----|------------------|------------------|------------------|---------|-------|-------|
|                  |          |     | Se                    | Mo   | Mi  | Se/C             | Mo/C             | Mi/C             | Se/C    | Mo/C  | Mi/C  |
| <b>rs2280091</b> | AA       | 344 | 95                    | 153  | 105 | 1(Reference)     | 1(Reference)     | 1(Reference)     | –       | –     | –     |
|                  | GA       | 121 | 37                    | 51   | 41  | 1.11(0.71-1.71)  | 0.95(0.64-1.38)  | 1.11(0.73-1.68)  | 0.644   | 0.781 | 0.622 |
|                  | GG       | 21  | 4                     | 7    | 10  | 0.69(0.23-2.05)  | 0.75(0.31-1.8)   | 1.56(0.71-3.41)  | 0.505   | 0.518 | 0.266 |
|                  | A        | 809 | 227                   | 357  | 251 | 1(Reference)     | 1(Reference)     | 1(Reference)     | –       | –     | –     |
|                  | G        | 163 | 45                    | 65   | 61  | 0.98(0.68-1.41)  | 0.90(0.66-1.23)  | 1.21(0.87-1.67)  | 0.93    | 0.526 | 0.26  |
| <b>rs2787094</b> | GG       | 270 | 76                    | 110  | 83  | 1(Reference)     | 1(Reference)     | 1(Reference)     | –       | –     | –     |
|                  | GC       | 191 | 47                    | 85   | 64  | 0.87(0.58-1.31)  | 1.09(0.78-1.53)  | 1.09(0.74-1.59)  | 0.518   | 0.609 | 0.65  |
|                  | CC       | 25  | 13                    | 16   | 9   | 1.84(0.90-3.78)  | 1.57(0.81-3.06)  | 1.17(0.52-2.61)  | 0.093   | 0.183 | 0.7   |
|                  | G        | 731 | 199                   | 305  | 230 | 1(Reference)     | 1(Reference)     | 1(Reference)     | –       | –     | –     |
|                  | C        | 241 | 73                    | 117  | 82  | 1.11(0.82-1.51)  | 1.16(0.9-1.50)   | 1.08(0.80-1.44)  | 0.492   | 0.25  | 0.6   |
| <b>rs3918396</b> | GG       | 387 | 104                   | 168  | 117 | 1(Reference)     | 1(Reference)     | 1(Reference)     | –       | –     | –     |
|                  | AG       | 92  | 29                    | 40   | 38  | 1.17(0.73-1.87)  | 1.0(0.66-1.51)   | 1.37(0.89-2.10)  | 0.506   | 0.994 | 0.156 |
|                  | AA       | 7   | 3                     | 3    | 1   | 1.59(0.41-6.27)  | 0.98(0.25-3.86)  | 0.47(0.05-3.89)  | 0.504   | 0.985 | 0.485 |
|                  | G        | 866 | 237                   | 376  | 272 | 1(Reference)     | 1(Reference)     | 1(Reference)     | –       | –     | –     |
|                  | A        | 106 | 35                    | 46   | 40  | 1.21(0.80-1.81)  | 0.99(0.69-1.44)  | 1.20(0.81-1.77)  | 0.367   | 0.997 | 0.354 |
| <b>rs677044</b>  | AA       | 345 | 92                    | 140  | 95  | 1(Reference)     | 1(Reference)     | 1(Reference)     | –       | –     | –     |
|                  | AG       | 121 | 38                    | 63   | 54  | 0.85(0.54-1.33)  | 1.01(0.68-1.48)  | 1.37(0.89-2.09)  | 0.479   | 0.973 | 0.143 |
|                  | GG       | 20  | 6                     | 8    | 7   | 0.81(0.31-2.09)  | 0.77(0.33-1.82)  | 1.08(0.44-2.65)  | 0.67    | 0.554 | 0.873 |
|                  | A        | 811 | 222                   | 3433 | 244 | 1(Reference)     | 1(Reference)     | 1(Reference)     | –       | –     | –     |
|                  | G        | 161 | 50                    | 79   | 68  | 1.08(0.44-2.66)  | 0.95(0.69-1.29)  | 1.19(0.86-1.66)  | 0.873   | 0.73  | 0.285 |
| <b>rs2853209</b> | AA       | 265 | 63                    | 112  | 72  | 1(Reference)     | 1(Reference)     | 1(Reference)     | –       | –     | –     |
|                  | TA       | 147 | 53                    | 82   | 60  | 0.96(0.61-1.53)  | 0.89(0.60-1.32)  | 1.17(0.74-1.85)  | 0.877   | 0.564 | 0.508 |
|                  | TT       | 74  | 20                    | 17   | 24  | 0.72(0.39-1.32)  | 0.37(0.20-0.67)  | 0.93(0.52-1.65)  | 0.288   | 0.001 | 0.799 |
|                  | A        | 677 | 179                   | 306  | 204 | 1(Reference)     | 1(Reference)     | 1(Reference)     | –       | –     | –     |
|                  | T        | 295 | 93                    | 116  | 108 | 0.85(0.63-1.15)  | 0.65(0.50-0.86)  | 0.98(0.74-1.32)  | 0.305   | 0.002 | 0.921 |
| <b>rs3918392</b> | AA       | 432 | 122                   | 179  | 134 | 1(Reference)     | 1(Reference)     | 1(Reference)     | –       | –     | –     |
|                  | AG       | 52  | 13                    | 31   | 20  | 0.69(0.36-1.32)  | 1.20(0.74-1.96)  | 1.06(0.61-1.86)  | 0.262   | 0.462 | 0.833 |
|                  | GG       | 2   | 1                     | 1    | 2   | 1.38(0.12-15.38) | 1.01(0.09-11.19) | 2.76(0.38-19.86) | 0.793   | 0.995 | 0.313 |
|                  | A        | 916 | 257                   | 389  | 288 | 1(Reference)     | 1(Reference)     | 1(Reference)     | –       | –     | –     |

G 56 15 33 24 0.76(0.42-1.37) 1.17(0.74-1.83) 1.18(0.71-1.94) 0.359 0.5 0.523

**Table S4.** Haplotype analysis of six SNPs of *ADAM33*.

| Locus 1   | Locus 2   | D'    | LOD   | r <sup>2</sup> | CI-low | CI-hi | Dist | T-int  |
|-----------|-----------|-------|-------|----------------|--------|-------|------|--------|
| rs2787094 | rs677044  | 0.115 | 1.92  | 0.011          | 0.04   | 0.19  | 270  | 90.93  |
| rs2787094 | rs2280091 | 0.944 | 17.26 | 0.066          | 0.82   | 0.99  | 1073 | -      |
| rs2787094 | rs2853209 | 0.223 | 2.08  | 0.012          | 0.09   | 0.34  | 2311 | -      |
| rs2787094 | rs3918396 | 0.808 | 43.53 | 0.239          | 0.73   | 0.87  | 2604 | -      |
| rs2787094 | rs3918392 | 0.763 | 26.14 | 0.147          | 0.66   | 0.84  | 6058 | -      |
| rs677044  | rs2280091 | 0.923 | 12.14 | 0.053          | 0.76   | 0.98  | 803  | 170.85 |
| rs677044  | rs2853209 | 0.366 | 10.96 | 0.061          | 0.27   | 0.45  | 2041 | -      |
| rs677044  | rs3918396 | 1     | 8.07  | 0.04           | 0.77   | 1     | 2334 | -      |
| rs677044  | rs3918392 | 0.952 | 50.67 | 0.271          | 0.88   | 0.99  | 5788 | -      |
| rs2280091 | rs2853209 | 0.919 | 60.88 | 0.26           | 0.86   | 0.96  | 1238 | 215.41 |
| rs2280091 | rs3918396 | 1     | 7.35  | 0.027          | 0.77   | 1     | 1531 | -      |
| rs2280091 | rs3918392 | 1     | 5.73  | 0.019          | 0.72   | 1     | 4985 | -      |
| rs2853209 | rs3918396 | 1     | 23.15 | 0.088          | 0.92   | 1     | 293  | 178.95 |
| rs2853209 | rs3918392 | 0.964 | 14.31 | 0.056          | 0.83   | 1     | 3747 | -      |
| rs3918396 | rs3918392 | 0.882 | 1.24  | 0.009          | 0.22   | 0.99  | 3454 | 98.09  |

[D prime (D') between two loci, Log of likelihood odds ratio (LOD), Correlation coefficient between two loci (r<sup>2</sup>), 95% confidence interval lower and upper bound on D' (CI-low and CO-hi), Distance between two loci (Dist) and statistic used by HapMap project in haploview software to measure the completeness of information represented by a set of markers in a region (T-int) are represented]

**Table S5.** Details of significantly associated haplotype SNPs of *ADAM33* among controls and asthma patients under study population.

| SNPs                    | Block | Haplotype | Case-Control frequency | Chi Square | Odds ratio | 95% Confidence Interval |
|-------------------------|-------|-----------|------------------------|------------|------------|-------------------------|
| rs2853209,<br>rs3918396 | AG    | 0.484     | 0.505, 0.458           | 3.337      | 0.50       | 0.46-0.55               |
|                         | TG    | 0.399     | 0.376, 0.429           | 4.469      | 0.38       | 0.33-0.42               |
|                         | AA    | 0.117     | 0.120, 0.113           | 0.146      | 0.12       | 0.09-0.15               |

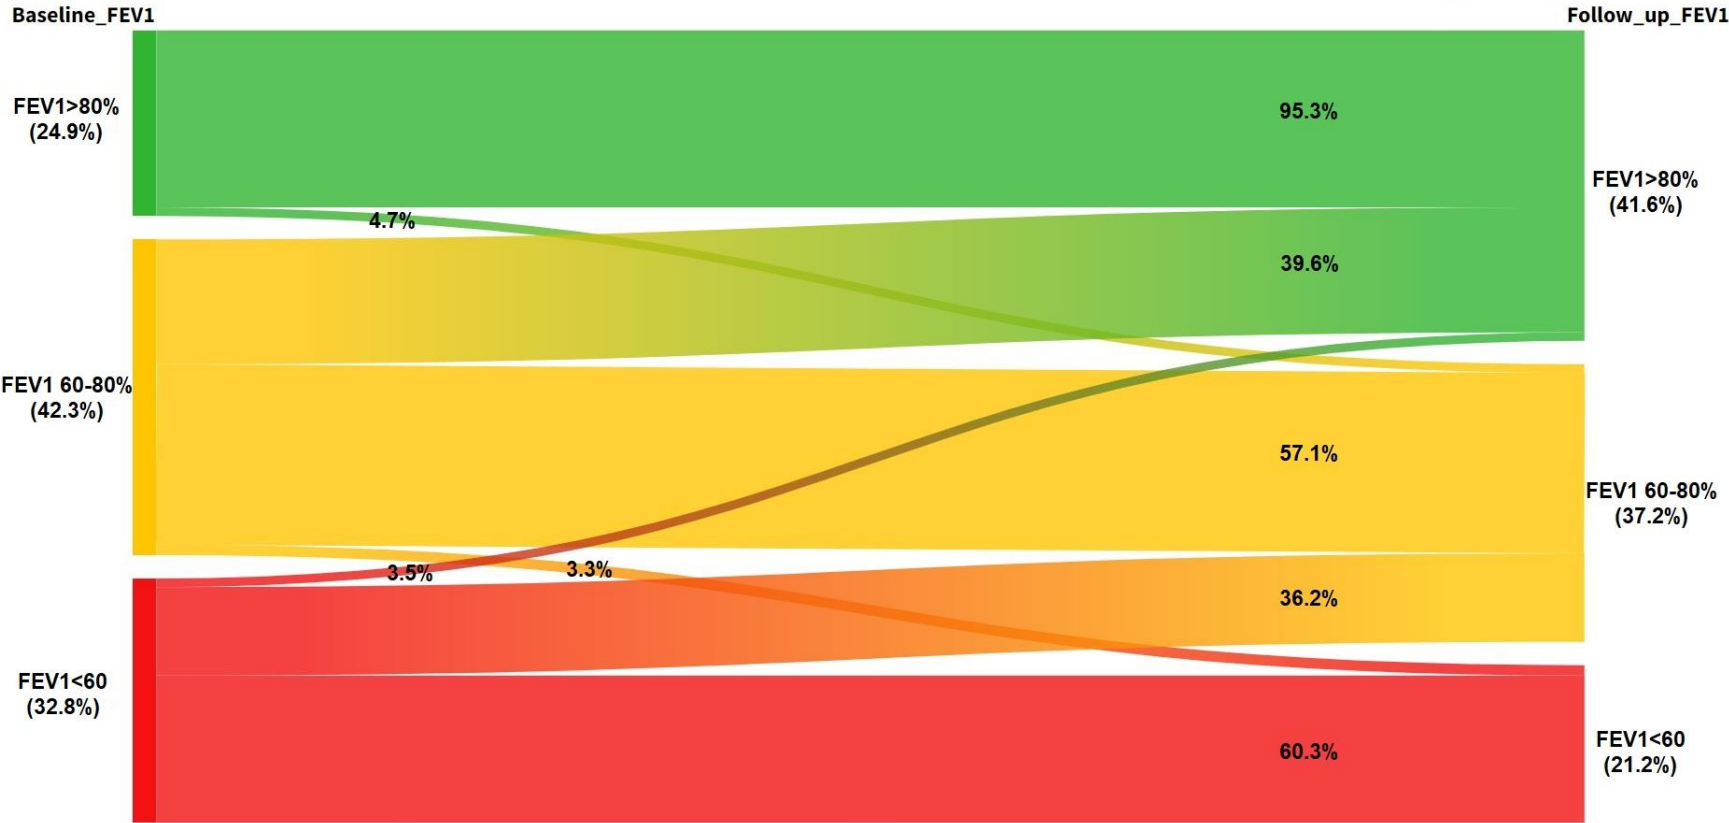

**Figure S1.** Alluvial chart depicting the changes in FEV<sub>1</sub> of asthma patients after three months of treatment. FEV<sub>1</sub>: Forced expiratory volume in one minute.
